# Supplementary material for: Vasoreactivity in CADASIL: Comparison to structural MRI and neuropsychology
Source: PubMed Central journal article supplement (PMC5998994; doi:10.1177/0271678x17710375), 2017-05-24
Supplement: JCB710375_supplementary_material.pdf [file JCB710375_supplementary_material.pdf]

## Supplementary Table 1: Peripheral vascular assessment – methods and background

| Vascular measure                                     | Method                                                                                                                                                                                                                                                                                                                                | Background                                                                                                                                                                  |
|------------------------------------------------------|---------------------------------------------------------------------------------------------------------------------------------------------------------------------------------------------------------------------------------------------------------------------------------------------------------------------------------------|-----------------------------------------------------------------------------------------------------------------------------------------------------------------------------|
| Pulse wave analysis (PWA)                            | Applanation tonometry used to record radial artery pressure waveforms with an automated device (SphygmoCor; AtCor Medical, Sydney, Australia) normalised to heart rate 75bpm. Mean of two readings used.                                                                                                                              | Assessment of the arterial pressure waveform which can reflect arterial stiffness and left ventricular load. Related to cardiovascular risk and mortality. <sup>1</sup>     |
| Pulse wave velocity (PWV), m/s                       | Distance between carotid and femoral arteries measured and divided by time delay between carotid and femoral pulses, calculated by ECG-gated applanation tonometry (SphygmoCor; AtCor Medical, Sydney, Australia).                                                                                                                    | Velocity of the pulse wave along aorto-iliac pathways is the gold-standard measure of arterial stiffness and has predictive value for cardiovascular outcomes. <sup>2</sup> |
| Reactive hyperaemia index (RHI), %                   | Digital pulse amplitude in test and control arms recorded during baseline, 5 min occlusion (BP cuff inflated to 200mmHg on the test upper arm), and following cuff deflation. A computerised algorithm (Endo-PAT2000, Itamar Medical Ltd, Caesarea, Israel) calculated the reactive hyperaemia index.                                 | Automated method of evaluating endothelial function in microcirculation of the finger. <sup>3</sup>                                                                         |
| Flow mediated dilatation (FMD) of brachial artery, % | Ultrasound imaging of brachial artery at rest, and following 5 min of forearm occlusion at 200mmHg. The maximum peak in diameter post cuff deflation compared to baseline was calculated (flow mediated dilatation, FMD, %) (Brachial Analyzer, MIA LLC, IA, USA).                                                                    | Measurement of brachial artery dilatation following shear stress created by forearm ischaemia. A non-invasive assessment of endothelial function. <sup>4</sup>              |
| Carotid intima media thickness (CIMT), mm            | B-mode ultrasound and a 7MHz probe (Acuson, Sequoia, Siemens Medical Solutions) used to obtain images of the posterior intima media layer in two planes. Automatic border detection software (Siemens Syngo® Arterial Health Package) used to measure the carotid intima media thickness (CIMT) and the average of all readings used. | A marker for early stages of generalised atherosclerosis which is associated with age, sex, blood pressure, BMI, cholesterol and diabetes. <sup>5</sup>                     |

## Supplementary Materials.

1. Mancia G, Laurent S, Agabiti-Rosei E, Ambrosioni E, Burnier M, Caulfield MJ *et al.* Reappraisal of European guidelines on hypertension management: a European Society of Hypertension Task Force document. *Journal of Hypertension* 2009; 27(11): 2121-2158.
2. Laurent S, Boutouyrie P, Asmar R, Gautier I, Laloux B, Guize L *et al.* Aortic Stiffness Is an Independent Predictor of All-Cause and Cardiovascular Mortality in Hypertensive Patients. *Hypertension* 2001; 37(5): 1236-1241.
3. Kuvin JT, Patel AR, Sliney KA, Pandian NG, Sheffy J, Schnall RP *et al.* Assessment of peripheral vascular endothelial function with finger arterial pulse wave amplitude. *American Heart Journal* 2003; 146(1): 168-174.
4. Celermajer DS, Sorensen KE, Gooch VM, Miller, Sullivan ID, Lloyd JK *et al.* Non-invasive detection of endothelial dysfunction in children and adults at risk of atherosclerosis. *The Lancet* 1992; 340(8828): 1111-1115.
5. O'Leary DH, Bots ML. Imaging of atherosclerosis: carotid intima-media thickness. *European Heart Journal* 2010; 31(14): 1682-1689.

**Supplementary Table 2: Cognitive outcomes compared to vascular and radiological measures.**

|                          |              | Processing speed | Executive function |
|--------------------------|--------------|------------------|--------------------|
| <b>Age</b>               | $r_s$        | -0.253           | 0.056              |
|                          | Sig (2 tail) | 0.268            | 0.815              |
|                          | n            | 21               | 20                 |
| <b>SBP</b>               | $r_s$        | 0.103            | -0.023             |
|                          | Sig (2 tail) | 0.657            | 0.925              |
|                          | n            | 21               | 20                 |
| <b>PWA</b>               | $r_s$        | 0.141            | 0.223              |
|                          | Sig (2 tail) | 0.542            | 0.345              |
|                          | n            | 21               | 20                 |
| <b>PWV</b>               | $r_s$        | -0.243           | 0.019              |
|                          | Sig (2 tail) | 0.302            | 0.937              |
|                          | n            | 20               | 19                 |
| <b>CIMT</b>              | $r_s$        | -0.463           | -0.266             |
|                          | Sig (2 tail) | <b>0.04</b>      | 0.271              |
|                          | n            | 20               | 19                 |
| <b>RHI</b>               | $r_s$        | -0.155           | -0.316             |
|                          | Sig (2 tail) | 0.525            | 0.188              |
|                          | n            | 19               | 19                 |
| <b>FMD</b>               | $r_s$        | 0.343            | -0.064             |
|                          | Sig (2 tail) | 0.164            | 0.808              |
|                          | n            | 18               | 17                 |
| <b>TCD CVR</b>           | $r_s$        | 0.230            | -0.04              |
|                          | Sig (2 tail) | 0.329            | 0.870              |
|                          | n            | 20               | 19                 |
| <b>GM CBF</b>            | $r_s$        | 0.292            | 0.324              |
|                          | Sig (2 tail) | 0.239            | 0.267              |
|                          | n            | 18               | 14                 |
| <b>GM CVR</b>            | $r_s$        | 0.500            | 0.258              |
|                          | Sig (2 tail) | 0.082            | 0.394              |
|                          | n            | 13               | 13                 |
| <b>SH CVR</b>            | $r_s$        | 0.291            | 0.159              |
|                          | Sig (2 tail) | 0.334            | 0.603              |
|                          | n            | 13               | 13                 |
| <b>nSH</b>               | $r_s$        | 0.174            | 0.025              |
|                          | Sig (2 tail) | 0.462            | 0.920              |
|                          | n            | 20               | 19                 |
| <b>nLV</b>               | $r_s$        | 0.667            | -0.344             |
|                          | Sig (2 tail) | <b>0.001</b>     | 0.149              |
|                          | n            | 20               | 19                 |
| <b>No of microbleeds</b> | $r_s$        | -0.226           | -0.143             |
|                          | Sig (2 tail) | 0.353            | 0.572              |
|                          | n            | 19               | 18                 |
| <b>nBV</b>               | $r_s$        | 0.512            | 0.441              |
|                          | Sig (2 tail) | <b>0.021</b>     | 0.059              |
|                          | n            | 20               | 19                 |

Abbreviations: CBF = cerebral blood flow; CVR = cerebrovascular reactivity; PWA = pulse wave analysis (measuring augmentation index at 75 bpm); PWV = pulse wave

Supplementary Materials.

velocity; GM = grey matter; CD = transcranial Doppler ultrasound; SH = subcortical hyperintensity; SBP = Systolic blood pressure; nSH = normalised subcortical hyperintensity volume; nLV = normalised lacune volume; nBV = normalised brain volume.

**Supplementary Table 3: Clinical outcomes and scales compared to vascular measures**

|                |           | History of stroke |           | Modified Rankin Scale |           | NIHSS     |           | HADS depression |           | HADS anxiety |           |
|----------------|-----------|-------------------|-----------|-----------------------|-----------|-----------|-----------|-----------------|-----------|--------------|-----------|
|                |           | No                | Yes       | 0-1                   | ≥2        | 0         | ≥1        | 0-7             | ≥8        | 0-7          | ≥8        |
| <b>Age</b>     | n         | 11                | 11        | 15                    | 7         | 17        | 5         | 12              | 9         | 13           | 8         |
|                | mean (SD) | 46 (12)           | 53 (9)    | 49 (12)               | 52 (10)   | 49 (11)   | 51 (12)   | 49 (11)         | 49 (13)   | 48 (12)      | 51 (11)   |
|                | p value   |                   | 0.088*    |                       | 0.581*    |           | 0.446*    |                 | 0.808*    |              | 0.645*    |
| <b>SBP</b>     | n         | 11                | 11        | 15                    | 7         | 17        | 5         | 12              | 9         | 13           | 8         |
|                | mean (SD) | 122 (12)          | 118 (10)  | 122 (9)               | 115 (12)  | 120 (10)  | 120 (15)  | 123 (10)        | 117 (12)  | 122 (10)     | 118 (12)  |
|                | p value   |                   | 0.513     |                       | 0.152     |           | 0.964     |                 | 0.295     |              | 0.445     |
| <b>PWA</b>     | n         | 11                | 11        | 15                    | 7         | 17        | 5         | 12              | 9         | 13           | 8         |
|                | mean (SD) | 17 (15)           | 17 (12)   | 16 (13)               | 18 (14)   | 16 (13)   | 20 (15)   | 18 (14)         | 15 (13)   | 13 (13)      | 22 (13)   |
|                | p value   |                   | 0.975     |                       | 0.806     |           | 0.543     |                 | 0.657     |              | 0.168     |
| <b>PWV</b>     | n         | 11                | 10        | 15                    | 6         | 17        | 4         | 12              | 8         | 13           | 7         |
|                | mean (SD) | 7.3 (1)           | 8.0 (1.2) | 7.6 (0.9)             | 7.6 (1.5) | 7.5 (1.0) | 8.3 (1.4) | 7.6 (1.0)       | 7.6 (1.4) | 7.5 (1.1)    | 7.7 (1.3) |
|                | p value   |                   | 0.188     |                       | 0.918     |           | 0.214     |                 | 0.956     |              | 0.798     |
| <b>CIMT</b>    | n         | 11                | 10        | 15                    | 6         | 16        | 5         | 12              | 8         | 13           | 7         |
|                | mean (SD) | 0.63(0.1)         | 0.65(0.1) | 0.62(0.1)             | 0.69(0.1) | 0.64(0.1) | 0.66(0.1) | 0.61(0.1)       | 0.67(0.1) | 0.61(0.9)    | 0.67(0.1) |
|                | p value   |                   | 0.692     |                       | 0.161     |           | 0.669     |                 | 0.230     |              | 0.162     |
| <b>RHI</b>     | N         | 10                | 10        | 15                    | 5         | 15        | 5         | 12              | 7         | 13           | 6         |
|                | mean (SD) | 2.2 (0.9)         | 2.1 (0.5) | 2.2 (0.7)             | 2.0 (0.5) | 2.2 (0.7) | 2.1 (0.6) | 2.1 (0.7)       | 2.2 (0.8) | 2.2 (0.8)    | 2.0 (0.6) |
|                | p value   |                   | 0.657     |                       | 0.583     |           | 0.857     |                 | 0.732     |              | 0.665     |
| <b>FMD</b>     | N         | 11                | 7         | 14                    | 4         | 15        | 3         | 12              | 6         | 13           | 5         |
|                | mean (SD) | 4.6 (1.9)         | 3.1 (1.6) | 4.1 (2.1)             | 3.9 (1.1) | 4.0 (2)   | 4.2 (0.6) | 4.2 (2.1)       | 3.6 (1.2) | 4.1 (2.1)    | 4.0 (1.0) |
|                | p value   |                   | 0.096     |                       | 0.831     |           | 0.876     |                 | 0.543     |              | 0.948     |
| <b>TCD CVR</b> | n         | 10                | 11        | 14                    | 7         | 16        | 5         | 11              | 9         | 12           | 8         |
|                | mean (SD) | 20 (10)           | 19 (12)   | 22 (12)               | 14 (8)    | 20 (12)   | 19 (10)   | 20 (12)         | 17 (10)   | 19 (13)      | 18 (8)    |
|                | p value   |                   | 0.840     |                       | 0.116     |           | 0.905     |                 | 0.961     |              | 0.955     |
| <b>GM CBF</b>  | n         | 11                | 8         | 15                    | 4         | 17        | 2         | 12              | 6         | 13           | 5         |
|                | mean (SD) | 51 (12)           | 51 (6)    | 50 (10)               | 54 (8)    | 50 (10)   | 57 (7)    | 51 (9)          | 51 (11)   | 50 (10)      | 54 (7)    |
|                | p value   |                   | 0.904*    |                       | 0.554     |           | 0.384     |                 | 0.961     |              | 0.467     |
| <b>GM CVR</b>  | n         | 8                 | 5         | 11                    | 2         | 12        | 1         | 10              | 3         | 11           | 2         |
|                | mean (SD) | 12 (7)            | 6 (12)    | 11 (9)                | -0.9 (4)  | 8 (8)     | 28 (NA)   | 12 (9)          | 1 (5)     | 11 (9)       | 2 (9)     |
|                | p value   |                   | 0.344     |                       | 0.083     |           | -         |                 | 0.076     |              | 0.254     |
| <b>SH CVR</b>  | n         | 8                 | 5         | 11                    | 2         | 12        | 1         | 10              | 3         | 11           | 2         |
|                | mean (SD) | 10 (7)            | 7 (9)     | 11 (7)                | 0.9 (1)   | 8 (7)     | 23 (NA)   | 11 (8)          | 2 (2)     | 10 (8)       | 2 (7)     |
|                | p value   |                   | 0.415     |                       | 0.105     |           | -         |                 | 0.083     |              | 0.342     |

\*Non-parametric test used. NA = not available; - = no statistical test performed.
